# Supplementary material
Source: PubMed Central journal article supplement (PMC4023140)

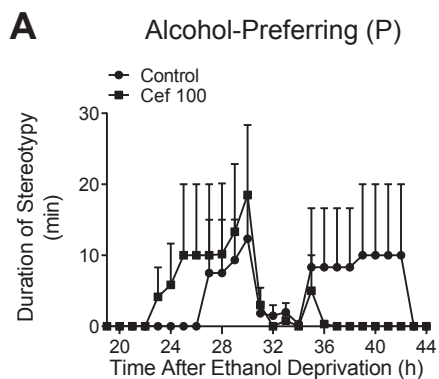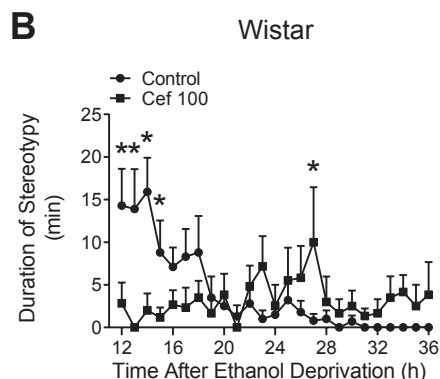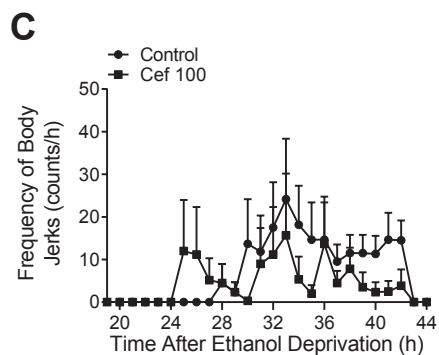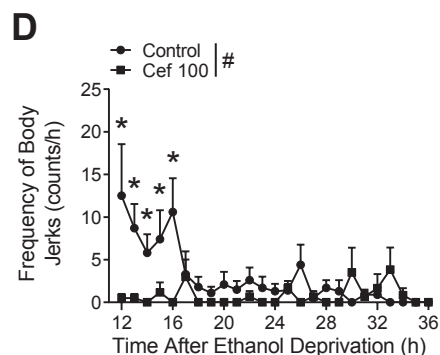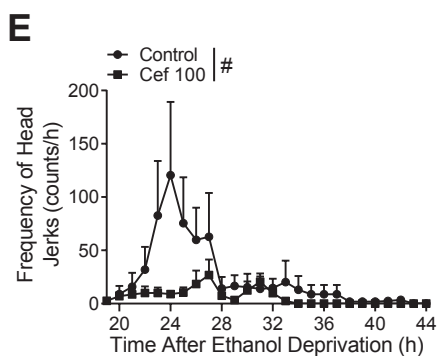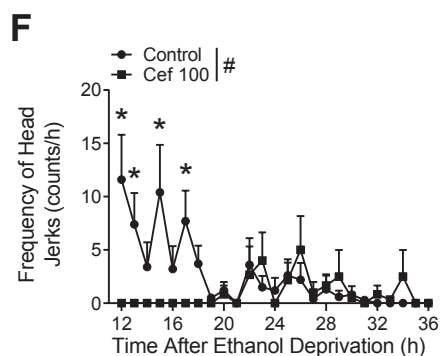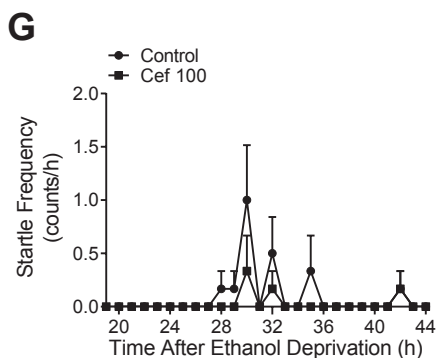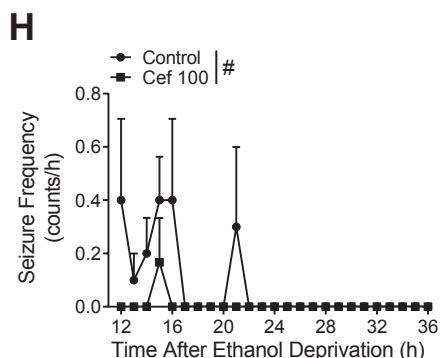

Supplement: npp201414x1.pdf [file npp201414x1.pdf]

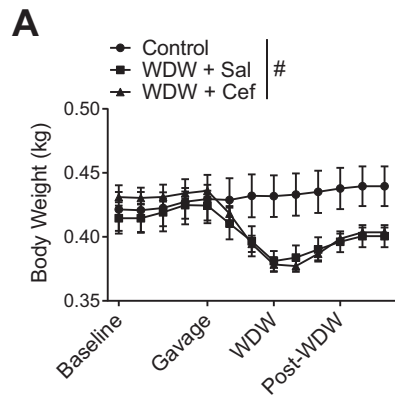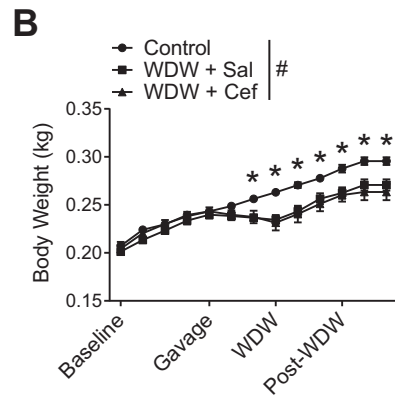

Supplement: npp201414x2.pdf [file npp201414x2.pdf]
